# Supplementary material for: Economic and environmental assessment of asphaltene-derived carbon fiber production
Source: Royal Society of Chemistry journal article supplement (doi:10.1039/d3gc01573d), 2023-01-01
Supplement: d3gc01573d1.pdf [file d3gc01573d1.pdf]

## **Supporting Information**

### **Economic and Environmental Assessment of Asphaltene-derived Carbon Fiber Production**

Md Abdullah Al Bari<sup>1#</sup>, Shariful Kibria Nabil<sup>1#</sup>, Shabab Saad<sup>1</sup>, Rahul Sarkar<sup>1</sup>, Sabrina Sabiha<sup>2</sup>,  
Muhammad M. Rahman<sup>3</sup>, and Md Golam Kibria<sup>1\*</sup>

<sup>#</sup>Equal contribution

<sup>1</sup>Department of Chemical and Petroleum Engineering, University of Calgary, 2500 University Drive, NW, Calgary, Alberta T2N 1N4, Canada.

<sup>2</sup>Department of Mechanical Engineering, Khulna University of Engineering & Technology, Khulna, Bangladesh.

<sup>3</sup>Department of Materials Science and Nano Engineering, Rice University, 6100 Main St., Houston, TX 77030, USA.

\*Correspondence: [md.kibria@ucalgary.ca](mailto:md.kibria@ucalgary.ca)

**Table S1** Specific heat values at constant pressure for materials/chemicals

| Materials/Chemicals | Specific heat at constant pressure, $C_p$ (kJ/kg-K) | References |
|---------------------|-----------------------------------------------------|------------|
| Asphaltene          | 2.20                                                | 1          |
| Carbon Fiber        | 1.60                                                | 2          |
| Toluene (liquid)    | 1.70                                                | 3          |
| Toluene (gas)       | 1.13                                                | 3          |
| Air                 | 1.00                                                | 4          |
| Nitrogen            | 1.04                                                | 5          |

**Energy calculation for asphaltene-derived carbon fiber (A-CF) production**

For various process steps of producing A-CF, the heat is calculated by using the following equation with the help of Table S1-

$$Q = m * c_p * \Delta T \quad (1)$$

Here,

$Q = \text{heat}$

$m = \text{mass}$

$c_p = \text{specific heat at constant pressure}$

$\Delta T = \text{temperature difference}$

Calculations for the heat requirement for the various process steps to produce 1 kg of A-CF are shown below:

**Heat required for heat treatment:**

The heat treatment of treated asphaltene takes place at 280°C. Using equation 1, the energy required for heat treatment is calculated as follows -

$$Q_1 = m * c_p * \Delta T = 1.77 \text{ kg} * 2.2 \frac{\text{kJ}}{\text{kg.K}} * (553.15 \text{ K} - 303.15 \text{ K}) = 973.50 \text{ kJ}$$

The heat treatment lasts three hours. Heat loss for one hour is 10%. So, for 3 hours, 30% of heat will be lost. Total heat required for heat treatment -

$$Q_{ht} = Q_1 * 1.30 = 973.50 \text{ kJ} * 1.30 = \mathbf{1265.55 \text{ kJ}}$$

**Heat required for spinning:**

Spinning is done at 260°C on heat-treated asphaltene. The heat required for spinning -

$$Q_{sp} = m * c_p * \Delta T = 1.77 \text{ kg} * 2.2 \frac{\text{kJ}}{\text{kg.K}} * (533.15 \text{ K} - 303.15 \text{ K}) = \mathbf{895.62 \text{ kJ}}$$

Due to the instantaneous spinning, heat loss during this process is not considered.

**Heat required for stabilization:**

In stabilization, the green fiber is heated in two steps. The fibers are first heated to 260°C for two hours, then to 350°C for one hour. The heat required for fiber stabilization including heat loss is as follows:

$$\begin{aligned} Q_{stab-f} &= m * c_p * \Delta T \\ &= 1.66 \text{ kg} * 1.6 \frac{\text{kJ}}{\text{kg.K}} \\ &\quad * \{(533.15 \text{ K} - 303.15 \text{ K}) * 1.2 + (623.15 - 533.15) * 1.1\} = 996 \text{ kJ} \end{aligned}$$

A constant flow of air is circulated into the furnace during stabilization, taking out heat in the process. Heat carrying out by air from 30°C to 260°C –

$$\begin{aligned} Q_{air-260^\circ C} &= \text{mass flow of air} * \text{total duration} * c_p * \Delta T \\ &= 1.78 \times 10^{-3} \frac{\text{kg}}{\text{s}} * 7200 \text{ s} * 1 \frac{\text{kJ}}{\text{kg.K}} * (533.15 \text{ K} - 303.15 \text{ K}) = 2947.68 \text{ kJ} \end{aligned}$$

Heat carrying out by air from 260°C to 350°C –

$$\begin{aligned} Q_{air-350^\circ C} &= \text{mass flow of air} * \text{total duration} * c_p * \Delta T \\ &= 1.78 \times 10^{-3} \frac{\text{kg}}{\text{s}} * 3600 \text{ s} * 1 \frac{\text{kJ}}{\text{kg.K}} * (623.15 - 533.15) = 576.72 \text{ kJ} \end{aligned}$$

Heat carrying out by air including heat loss -

$$Q_{air} = Q_{air-260^{\circ}C} * 1.20 + Q_{air-350^{\circ}C} * 1.10 = 2947.68 \text{ kJ} * 1.2 + 576.72 \text{ kJ} * 1.1$$

$$= 4171.60 \text{ kJ}$$

**Heat required for carbonization:**

The stabilized fiber is heated in two steps during carbonization. First, it is heated from 30°C to 500°C for half an hour, followed by 1500°C for one hour. The required amount of heat for stabilized fiber is as follows:

$$Q_{car-f} = m * c_p * \Delta T$$

$$= 1.35 \text{ kg} * 1.6 \frac{\text{kJ}}{\text{kg.K}}$$

$$* \{(773.15 \text{ K} - 303.15 \text{ K}) * 1.05 + (1773.15 - 773.15) * 1.10\} = 3441.96 \text{ kJ}$$

During carbonization, the nitrogen gas is also flowing into the furnace. Heat carrying out by nitrogen from 30°C to 500°C –

$$Q_{N2-500^{\circ}C} = \text{mass flow of nitrogen} * \text{total duration} * c_p * \Delta T$$

$$= 1.83 \times 10^{-4} \frac{\text{kg}}{\text{s}} * 1800 \text{ s} * 1.04 \frac{\text{kJ}}{\text{kg.K}} * (773.15 \text{ K} - 303.15 \text{ K}) = 161.01 \text{ kJ}$$

Heat carrying out by nitrogen from 500°C to 1500°C –

$$Q_{N2-1500^{\circ}C} = \text{mass flow of nitrogen} * \text{total duration} * c_p * \Delta T$$

$$= 1.83 \times 10^{-4} \frac{\text{kg}}{\text{s}} * 3600 \text{ s} * 1.04 \frac{\text{kJ}}{\text{kg.K}} * (1773.15 \text{ K} - 773.15 \text{ K})$$

$$= 685.15 \text{ kJ}$$

Total heat carrying out by nitrogen including heat loss -

$$Q_{N2} = \text{Heat}_{N2-500^{\circ}C} * 1.05 + \text{Heat}_{N2-1500^{\circ}C} * 1.10 = 161.01 \text{ kJ} * 1.05 + 685.15 \text{ kJ} * 1.1$$

$$= 922.73 \text{ kJ}$$

Total energy requirement for the CF production process (without solvent recovery) –

$$Q_{total} = Q_{ht} + Q_{sp} + Q_{stab-f} + Q_{air} + Q_{car-f} + Q_{N2}$$

$$= 1265.55 \text{ kJ} + 895.62 \text{ kJ} + 996 \text{ kJ} + 4171.60 \text{ kJ} + 3441.96 \text{ kJ} + 922.73 \text{ kJ} = 11693.46 \text{ kJ}$$

$$\cong 3.25 \frac{\text{kWh}}{\text{kg CF}}$$

### **Calculation of solvent (toluene) recovery energy**

Toluene is used as a solvent for A-CF production, in which the raw asphaltene is dissolved in toluene to eliminate any residual solids. Given the substantial quantity of toluene required for the asphaltene pretreatment, the recovery of toluene is essential to reduce production costs and ensure environmental protection. Specifically, to dissolve 1 kg of raw asphaltene, 12.93 kg of toluene is required. With a mass yield of 49.69%, 26.02 kg of toluene is required per kilogram of A-CF. The majority of the toluene can be reclaimed by boiling and condensation, with an estimated recovery rate of approximately 98%.

*Amount of toluene to recover*

$$= \text{Toluene required per kg of carbon fiber} * \text{recovery rate}$$

$$\text{Amount of toluene to recover} = 26.02 \text{ kg} * 0.98 = 25.50 \text{ kg}$$

The recovery process for toluene involves heating it to a temperature approximately 10°C above its boiling point and subsequently condensing it at room temperature.

The total amount of heat required to recover toluene per kg of A-CF is calculated as follows:

$$Q_{tol} = m_l * c_{p1} * (t_b - t_r) + m_l * l_f + m_l * c_{p2} * (t_f - t_b)$$

$$Q_{tol} = 25.50 \text{ kg} * 1.7 \frac{\text{kJ}}{\text{kg.K}} * (383.75 \text{ K} - 303.15 \text{ K}) + 25.50 \text{ kg} * 413 \frac{\text{kJ}}{\text{kg}} + 25.50$$

$$* 1.13 \frac{\text{kJ}}{\text{kg.K}} * (393.75 \text{ K} - 383.75 \text{ K}) = 14287.65 \frac{\text{kJ}}{\text{kg}} \cong 3.97 \frac{\text{kWh}}{\text{kg}}$$

Here,

$m_l$  = mass of toluene to recover,

$c_{p1}$  = specific heat of liquid toluene at const. pressure

$c_{p2}$  = specific heat of toluene gas at const. pressure

$l_f = \text{Toluene heat (enthalpy) of evaporation}$

$t_b = \text{boiling point temperature of toluene}$

$t_r = \text{room temperature}$

$t_f = \text{final temperature}$

As the boiling point temperature is approximately 80°C higher than the room temperature, condensation of toluene vapor doesn't need any external energy.

**Calculation for the fixed cost of A-CF production:**

**Table S2** Capital cost for equipment of an A-CF plant capable of producing 2000 tonnes/year<sup>6,7</sup>

| Equipment                         | Million USD (April 2022) |
|-----------------------------------|--------------------------|
| Pre-treatment equipment           | 2.79                     |
| Melt-spinning machine             | 3.49                     |
| Stabilization oven                | 8.38                     |
| Carbonization oven                | 9.77                     |
| Post-processing equipment         | 5.59                     |
| Installation, commissioning       | 16.90                    |
| Drivers, rollers, ancillary, etc. | 8.66                     |
| Overhead cost                     | 6.18                     |
| Total cost                        | 61.76                    |

Capital cost for equipment is calculated as annuity over the expected lifetime by using the following equation:

$$\text{Annual cost} = \text{Capital investment} \times \frac{r \times (1 + r)^n}{(1 + r)^n - 1}$$

$$= \$61.76 \times 10^6 \text{ for } 2000 \frac{\text{tonnes}}{\text{year}} \times \frac{0.1 \times (1 + 0.1)^{25}}{(1 + 0.1)^{25} - 1}$$

$$= \$6.80 \times 10^6 \text{ for } 2000 \frac{\text{tonnes}}{\text{year}}$$

$$= \$3.40 \text{ for } 1 \text{ kg/year}$$

**Table S3** Fixed cost breakdown of A-CF production

| <b>Equipment</b>                  | <b>USD (April 2022)/kg of A-CF</b> |
|-----------------------------------|------------------------------------|
| Pre-treatment equipment           | 0.15                               |
| Melt-spinning machine             | 0.19                               |
| Stabilization oven                | 0.46                               |
| Carbonization oven                | 0.54                               |
| Post-processing equipment         | 0.31                               |
| Installation, commissioning       | 0.93                               |
| Drivers, rollers, ancillary, etc. | 0.48                               |
| Overhead cost                     | 0.34                               |
| <b>Total</b>                      | <b>3.40</b>                        |

**Table S4** Variable cost breakdown of A-CF production

| <b>Elements</b>              | <b>Unit</b> | <b>Unit cost, USD</b> | <b>Amount required /kg of A-CF</b> | <b>USD/kg of A-CF</b> |
|------------------------------|-------------|-----------------------|------------------------------------|-----------------------|
| Precursor                    | kg          | 0.52 <sup>(8)</sup>   | 2.01                               | 1.05                  |
| Solvent (toluene)            | kg          | 1.00 <sup>(9)</sup>   | 0.52                               | 0.52                  |
| Acid (40% HNO <sub>3</sub> ) | kg          | 0.82 <sup>(10)</sup>  | 0.004                              | 0.0032                |
| Nitrogen                     | kg          | 0.53 <sup>(11)</sup>  | 1.00                               | 0.53                  |
| Electricity                  | kWh         | 0.072 <sup>(12)</sup> | 7.22                               | 0.49                  |
| Miscellaneous (20%)          | -           | -                     | -                                  | 0.65                  |
| <b>Total</b>                 | -           | -                     | -                                  | <b>3.24</b>           |

A conversion factor of 0.80 is used to convert CAD to USD.

**Table S5** Base case assumptions in the TEA study of A-CF production

| <b>Parameters</b>                      | <b>Value</b> |
|----------------------------------------|--------------|
| Precursor cost (\$/kg)                 | 0.52         |
| Solvent usage (kg/kg of CF)            | 26.00        |
| Rate of solvent recovery (%)           | 98.00        |
| Electricity consumption (kWh/kg of CF) | 7.22         |
| Electricity price (\$/kWh)             | 0.072        |
| Base Yield (%)                         | 49.69        |
| N <sub>2</sub> usage (kg/kg CF)        | 1.00         |
| Capital cost (\$/kg of CF)             | 3.40         |
| WACC (%)                               | 10.00        |
| Yearly production (tonne/year)         | 2000         |

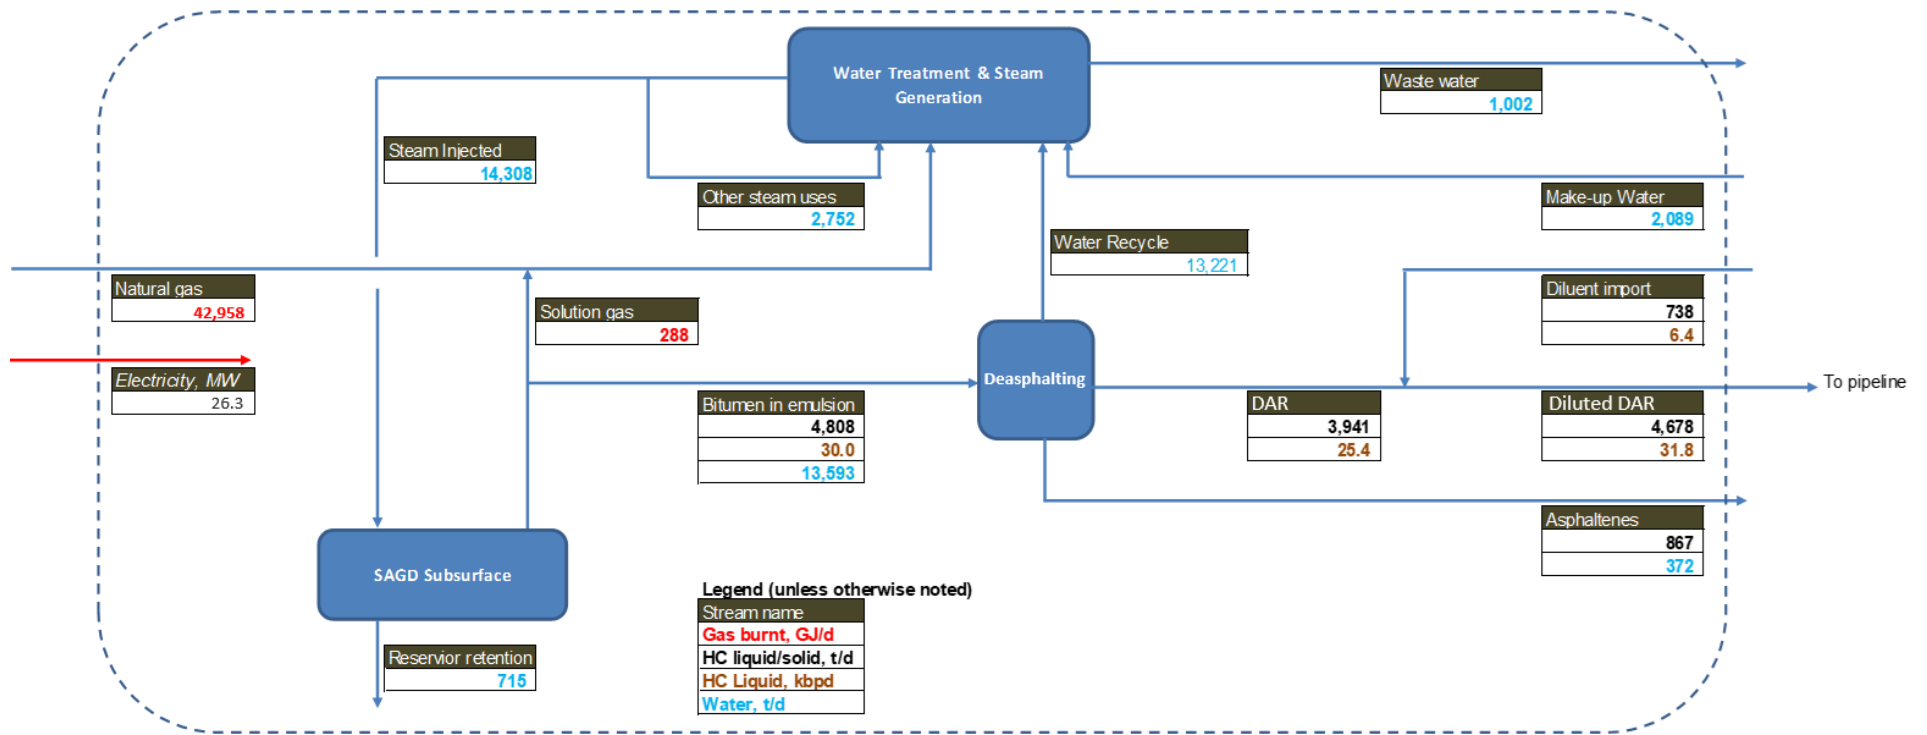

**Fig. S1** Simplified mass and energy balance for the partial upgrading process of bitumen with steam assisted gravity drainage (SAGD). The data has been collected from a leading bitumen upgrading company in Alberta, Canada who has requested anonymity.



### **GWP For water (H<sub>2</sub>O) extraction**<sup>13</sup>

Underground water pumping energy = 0.45 kWh/m<sup>3</sup>

Average treatment energy before supply = 0.327 kWh/m<sup>3</sup>

$$\text{Total energy} = 0.78 \text{ kWh/m}^3 = (0.78/1000) = \frac{0.78 \text{ kWh}}{\text{m}^3} \times \frac{\text{m}^3}{1000 \text{ kg}} = 7.8 \times 10^{-4} \text{ kWh/kg}$$

EEF = 0.434 kg CO<sub>2</sub>e/kWh

$$\text{GWP for water treatment and supply} = \frac{0.00078 \text{ kWh}}{\text{kg}} \times \frac{0.434 \text{ kg CO}_2\text{-eq}}{\text{kWh}} = \mathbf{3.39 \times 10^{-4} \text{ kg CO}_2\text{-eq/kg}}$$

### **H<sub>2</sub>O**

### **Precursor energy calculation (i.e., upstream asphaltene extraction)**

From Fig. S1, for per day basis,

Electricity input = 26.3 MW

$$\text{Natural gas input} = 42958 \text{ GJ/d} = \frac{42958 \text{ GJ}}{\text{d}} \times \frac{0.01157 \text{ MW}}{1 \text{ GJ/d}} = 497.02 \text{ MW}$$

$$\text{Total energy input} = (497.02 + 26.3) \text{ MW} = 523.32 \text{ MW} = (523.32 \times 24) \text{ MWh} = 12559.8 \text{ MWh}$$

Mass of produced asphaltene = 867 tonne

Mass of DAR = 3941 tonne

$$\text{Allocation coefficient for asphaltene} = \frac{867}{867+3941} = 0.18$$

$$\text{Allocated utility input for asphaltene} = \frac{12559.8 \text{ MWh}}{867 \text{ tonne}} \times \frac{0.18 \times 1000 \text{ kWh}}{1 \text{ MWh}} \times \frac{1 \text{ tonne}}{1000 \text{ kg}} = 2.61 \text{ kWh/kg}$$

Extraction energy for toluene (assuming the diluent as toluene) = 0.74 kWh/kg

Toluene required in the process = 738 tonne

$$\text{Allocated embodied energy from toluene} = \frac{738 \text{ tonne}}{867 \text{ tonne}} \times \frac{0.18 \times 0.74 \text{ kWh}}{\text{kg}} \times \frac{1 \text{ tonne}}{1000 \text{ kg}} \times \frac{1000 \text{ kg}}{1 \text{ tonne}} = 0.11$$

kWh/kg asphaltene

As water is recycled within the process, only energy for make-up water is considered.

Extraction energy for water =  $7.8 \times 10^{-4}$  kWh/kg

Make-up water required in the process = 2089 tonne

$$\text{Allocated embodied energy from water} = \frac{2089 \text{ tonne} \times (7.8 \times 10^{-4}) \times 0.18}{867 \text{ tonne}} \times \frac{1 \text{ tonne}}{1000 \text{ kg}} \times \frac{1000 \text{ kg}}{1 \text{ tonne}} = 0.0003 \text{ kWh/kg asphaltene}$$

Total allocated upstream energy for extraction = (2.61 + 0.11 + 0.0003) kWh/kg = **2.73 kWh/kg asphaltene**

**Table S6** Emission factors for specific midpoint indicators<sup>14</sup>

| <b>ILCD midpoint indicators</b>                                                | <b>NG based without carbon capture and storage (CCS)</b> | <b>Hydropower</b> |
|--------------------------------------------------------------------------------|----------------------------------------------------------|-------------------|
| Climate change or Global Warming Potential, GWP (kg CO <sub>2</sub> -eq / kWh) | 0.434                                                    | 0.0107            |
| Freshwater eutrophication, FU (kg P-eq / kWh)                                  | 19.7E-06                                                 | 1.33E-06          |
| Acidification, AP (mol H <sup>+</sup> -eq/kWh)                                 | 3.26E-04                                                 | 4.45E-05          |
| Ozone layer depletion, OLD (kg CFC-11-eq/kWh)                                  | 6.66E-08                                                 | 2.37E-09          |

**Table S7** Energy breakdown for the A-CF production technology

| <b>Process</b>                   | <b>Energy (kWh/kg asphaltene)</b> | <b>Energy (kWh/kg CF)*</b> |
|----------------------------------|-----------------------------------|----------------------------|
| Primary feedstock extraction     | 2.73                              | 5.49                       |
| Pre-treatment & solvent recovery | 2.16                              | 4.35                       |
| Spinning                         | 0.29                              | 0.60                       |
| Acid treatment & stabilization   | 0.48                              | 0.957                      |
| Carbonization                    | 0.94                              | 1.89                       |
| Balance of plant (BoP)           | 1.94                              | 3.89                       |
| Total energy                     | 8.53                              | 17.19                      |

\*for baseline process yield of 49.67%

**Table S8** GWP, FU, AP and OLD breakdown for the auxiliary feedstocks utilized in A-CF production technology

| Feedstock        | Energy (kWh/kg CF) | GWP (kg CO <sub>2</sub> -eq/kg CF)* | FU (kg P-eq/kg CF)x10 <sup>-4</sup> # | AP (mol H <sup>+</sup> -eq/kg CF) x10 <sup>-3</sup> ** | OLD (kg CFC-11-eq/kg CF) ## |
|------------------|--------------------|-------------------------------------|---------------------------------------|--------------------------------------------------------|-----------------------------|
| Electricity      | 7.42               | 3.22                                | 1.46                                  | 2.42                                                   | 4.94                        |
| Heat             | 4.99               | 2.17                                | 0.98                                  | 1.63                                                   | 3.32                        |
| Toluene          | 4.57               | 1.98                                | 0.90                                  | 1.49                                                   | 3.04                        |
| N <sub>2</sub>   | 0.19               | 0.003                               | 0.037                                 | 0.062                                                  | 0.13                        |
| HNO <sub>3</sub> | 0.0068             | 0.08                                | 0.0013                                | 0.002                                                  | 0.005                       |
| Water            | 0.0038             | 0.0033                              | 0.0007                                | 0.001                                                  | 0.003                       |

\*with a baseline emission factor = 0.434 kg CO<sub>2</sub>-eq/kWh

#with a baseline emission factor = 19.7E-6 kg CO<sub>2</sub>-eq/kWh

\*\*with a baseline emission factor = 3.26E-4 kg CO<sub>2</sub>-eq/kWh

##with a baseline emission factor = 6.66E-8 kg CO<sub>2</sub>-eq/kWh

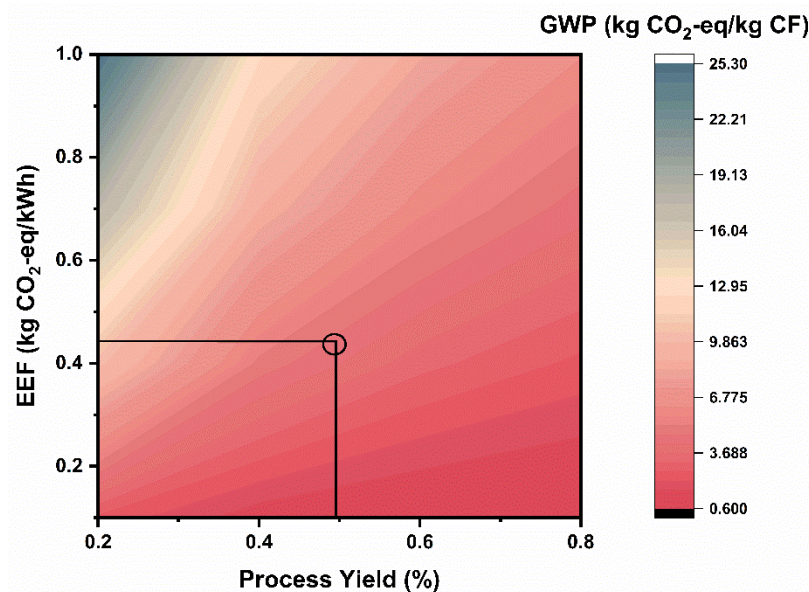

**Fig. S2** Tandem or two-parameter sensitivity analysis for A-CF technology showing the effect of key performance indicators (electricity emission factor; EEF and process yield).

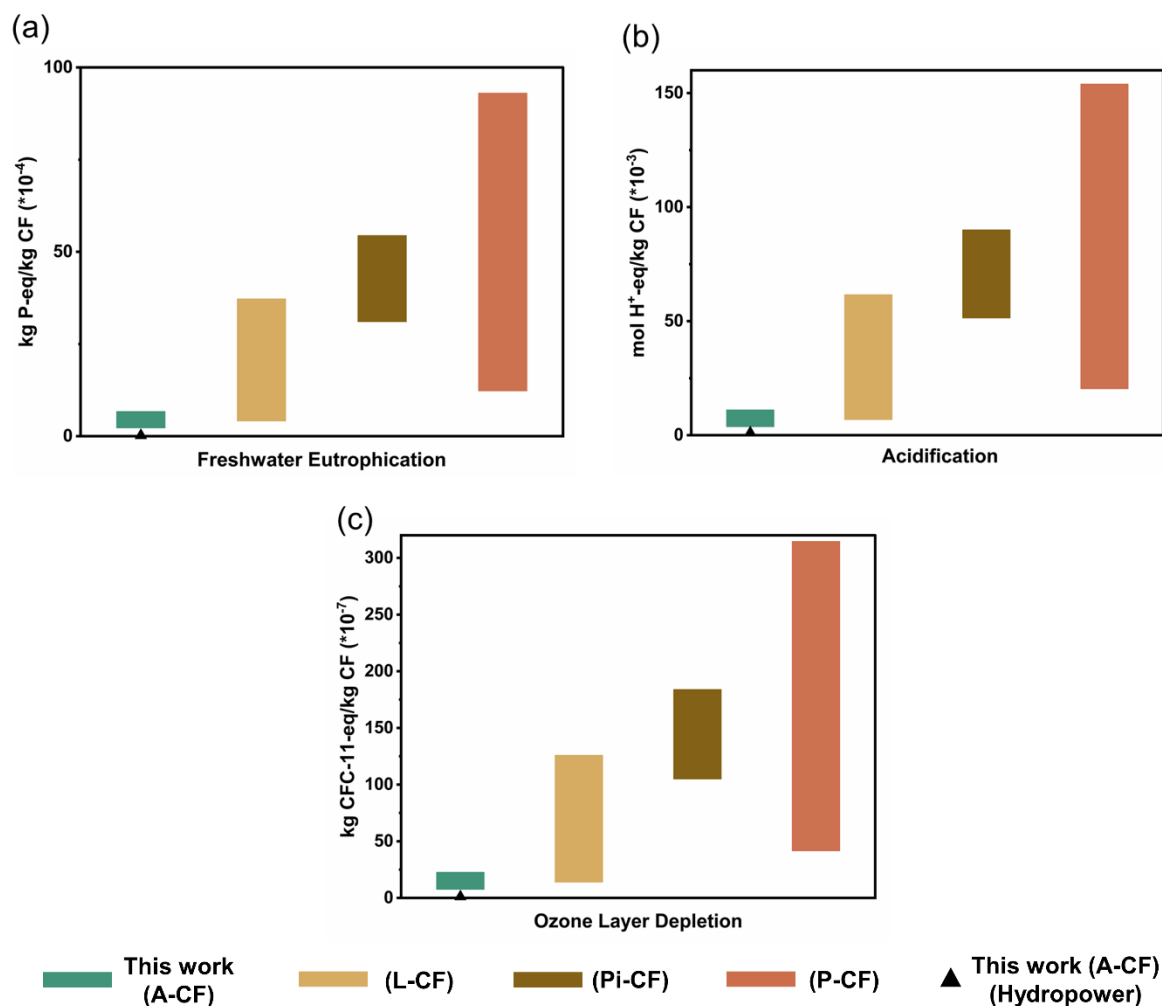

**Fig. S3** Comparative cradle-to-gate assessment between different routes of CFPT, (a) freshwater eutrophication (FU), (b) acidification (AP), and (c) ozone layer depletion (OLD). The emission factors for base case as well as the low-carbon scenario are provided under Table S6. The low- and high-end range for A-CF have been derived from yield (25% vs 75%) while primary energy requirement for other incumbent routes have been collected from open literature (Table S9).

**Table S9** Primary energy for the incumbent routes (data collected from open literatures)

|                                         | <b>Energy (kWh/kg CF)</b> | <b>References</b> |
|-----------------------------------------|---------------------------|-------------------|
| <b>PAN based carbon fiber (P-CF)</b>    | 83.33 – 472.22            | 15,16             |
|                                         | 68.05                     | 17                |
|                                         | 79.44                     | 18                |
|                                         | 25.73                     | 19                |
|                                         | 195.56                    | 17,20             |
|                                         | 110.14                    | 21                |
| <b>Lignin-based carbon fiber (L-CF)</b> | 188.89                    | 15                |
|                                         | 21.11                     | 22                |
|                                         | 186.12                    | 15                |
| <b>Pitch-based carbon fiber (Pi-CF)</b> | 230                       | 16                |
|                                         | 276                       | 16,23             |
|                                         | 157.78                    | 24                |

## References

- 1 E. Álvarez, F. Trejo, G. Marroquín and J. Ancheyta, *Pet. Sci. Technol.*, 2015, **33**, 265–271.
- 2 C. Pradere, J. C. Batsale, J. M. Goyhénèche, R. Paillet and S. Dilhaire, *Carbon N. Y.*, 2009, **47**, 737–743.
- 3 Engineering Toolbox, Toluene-Thermophysical Properties, [https://www.engineeringtoolbox.com/toluene-methylbenzene-properties-d\\_2095.html](https://www.engineeringtoolbox.com/toluene-methylbenzene-properties-d_2095.html), (accessed 15 March 2023).
- 4 Engineering Toolbox, Air-Thermophysical Properties, [https://www.engineeringtoolbox.com/air-properties-d\\_156.html](https://www.engineeringtoolbox.com/air-properties-d_156.html), (accessed 15 March 2023).
- 5 Engineering Toolbox, Nitrogen-Thermophysical Properties, [https://www.engineeringtoolbox.com/nitrogen-d\\_1421.html](https://www.engineeringtoolbox.com/nitrogen-d_1421.html), (accessed 15 March 2023).
- 6 Omnia LLC, *Assessment of Carbon Fiber Manufacturing Cost*, 2012.
- 7 T. Ellringmann, C. Wilms, M. Warnecke, G. Seide and T. Gries, *Text. Res. J.*, 2016, **86**, 178–190.
- 8 J. Zhou, P. Bomben, M. Gray and B. Henfenbaum, *Alberta Innovates, Bitumen Beyond Combustion*, 2021.

- 9 ChemAnalyst, Toluene Price Trend and Forecast, <https://www.chemanalyst.com/Pricing-data/toluene-30>, (accessed 11 February 2023).
- 10 Indexbox, Northern America: Market for Nitric Acid And Sulphonitric Acids 2023, <https://www.indexbox.io/store/northern-america-nitric-acid-and-sulphonitric-acids-market-analysis-forecast-size-trends-and-insights/>, (accessed 11 February 2023).
- 11 Rutherford & Titan, The Price Of Liquid Nitrogen In The United States, <https://www.rutherfordtitan.com/liquid-nitrogen-generators/liquid-nitrogen-price-usa/?v=7516fd43adaa>, (accessed 11 February 2023).
- 12 ParkPower, Commercial Electricity Rates, <https://parkpower.ca/compare-commerical-electricity-rates/>, (accessed 10 February 2023).
- 13 A. K. Plappally and J. H. Lienhard V, *Renew. Sustain. Energy Rev.*, 2012, **16**, 4818–4848.
- 14 U. N. E. C. F. EUROPE, *Life cycle assessment of electricity generation options*, 2021.
- 15 F. Hermansson, M. Janssen and M. Svanström, *J. Clean. Prod.*, 2019, **223**, 946–956.
- 16 S. Das, *Sustainable Coal Tar Pitch Carbon Fiber Manufacturing*, 2021.
- 17 S. Das, *Int. J. Life Cycle Assess.*, 2011, **16**, 268–282.
- 18 T. Suzuki and J. Takahashi, *Ninth Japan Int. SAMPE Symp. JISSE-9*, 2005, 14–19.
- 19 T. Suzuki and J. Takahashi, *15th Int. Conf. Compos. Mater.*, 2005, 1–5.
- 20 F. Hermansson, S. Heimersson, M. Janssen and M. Svanström, *Resour. Conserv. Recycl.*, , DOI:10.1016/j.resconrec.2022.106234.
- 21 K. Sakamoto, K. Kawajiri, H. Hatori and K. Tahara, *Sustain.*, , DOI:10.3390/su14063541.
- 22 M. Janssen, E. Gustafsson, L. Echardt, J. Wallinder, J. Wolf and S. Skogsägarna ekonomisk förening, in *14th Conference on sustainable development of energy, water and environment systems*, 2019, pp. 1–10.
- 23 M. Theodore, R. Paul and A. Naskar, Carbon fiber technology facility, Oak Ridge National Lab, 2021, 1–13.
- 24 US Department of Energy, *Bandwidth Study on Energy Use and Potential Energy Saving Opportunities in the Manufacturing of Lightweight Materials: Carbon Fiber Reinforced Polymer Composites*, 2016, vol. 2091.
